# Supplementary material for: Characterizing Active Ingredients of eHealth Interventions Targeting Persons With Poorly Controlled Type 2 Diabetes Mellitus Using the Behavior Change Techniques Taxonomy: Scoping Review
Source: PubMed Central journal article supplement (PMC5658649; doi:10.2196/jmir.7135), 2017-10-12
Supplement: jmir_v19i10e348_app1.pdf [file jmir_v19i10e348_app1.pdf]

### Supplementary material 1: Search keywords and output

| <b>Database</b>       | <b>Search strategy</b>                                                                                                                                                                                                                                                                                                                                                                                                                                            | <b>Articles retrieved</b> |
|-----------------------|-------------------------------------------------------------------------------------------------------------------------------------------------------------------------------------------------------------------------------------------------------------------------------------------------------------------------------------------------------------------------------------------------------------------------------------------------------------------|---------------------------|
| <b>PubMed</b>         | <i>((((((((eHealth[Title/Abstract]) OR Telemedicine[Title/Abstract]) OR Telehealth[Title/Abstract]) OR mHealth[Title/Abstract] OR mobile health[Title/Abstract] ) OR web based[Title/Abstract]) OR internet[Title/Abstract] OR web-based[Title/Abstract]) OR Digital media[Title/Abstract]) OR short message service[Title/Abstract]) OR text message\$[Title/Abstract]) OR videogame\$[Title/Abstract]) OR Health game\$[Title/Abstract] AND Type 2 Diabetes</i> | <b>624</b>                |
| <b>Psych Info</b>     | <i>(mHealth OR mobile Health OR eHealth OR Internet OR web based intervention OR mobile app OR web-based OR Digital media OR Telemedicine OR Telehealth OR Videogame OR Health game) AND (Type 2 Diabetes)</i>                                                                                                                                                                                                                                                    | <b>5</b>                  |
| <b>Web of Science</b> | <i>(eHealth OR mHealth OR mobile Health OR Telemedicine OR Telehealth OR web based intervention OR internet OR web-based OR Digital media OR short message service OR text message\$ OR videogame\$ OR Health game\$) AND (“Type 2 Diabetes”)</i>                                                                                                                                                                                                                 | <b>775</b>                |
